# Supplementary material for: Reversible and easy post-crosslinking method for developing a surface ion-imprinted hypercrosslinked monolith for specific Cd(ii) ion removal from aqueous solutions
Source: Royal Society of Chemistry journal article supplement (doi:10.1039/c6ra17150h), 2016-01-01
Supplement: c6ra17150h1.pdf [file c6ra17150h1.pdf]

## Supplementary Information

### Reversible and Easy Post-crosslinking Method for Developing Surface Ion-imprinted Hypercrosslinked Monolith for Specific Cd(II) Ion Removal from Aqueous Solutions

**Mehmet Emin Çorman<sup>1,2</sup>, Canan Armutcu<sup>1</sup>, Lokman Uzun<sup>1\*</sup>, Rıdvan Say<sup>3</sup>, Adil Denizli<sup>1</sup>**

<sup>1</sup>Hacettepe University, Department of Chemistry, Ankara, Turkey

<sup>2</sup>Sinop University, Department of Bioengineering, Sinop, Turkey

<sup>3</sup>Anadolu University, Department of Chemistry, Eskişehir, Turkey

### Surface Area Measurements

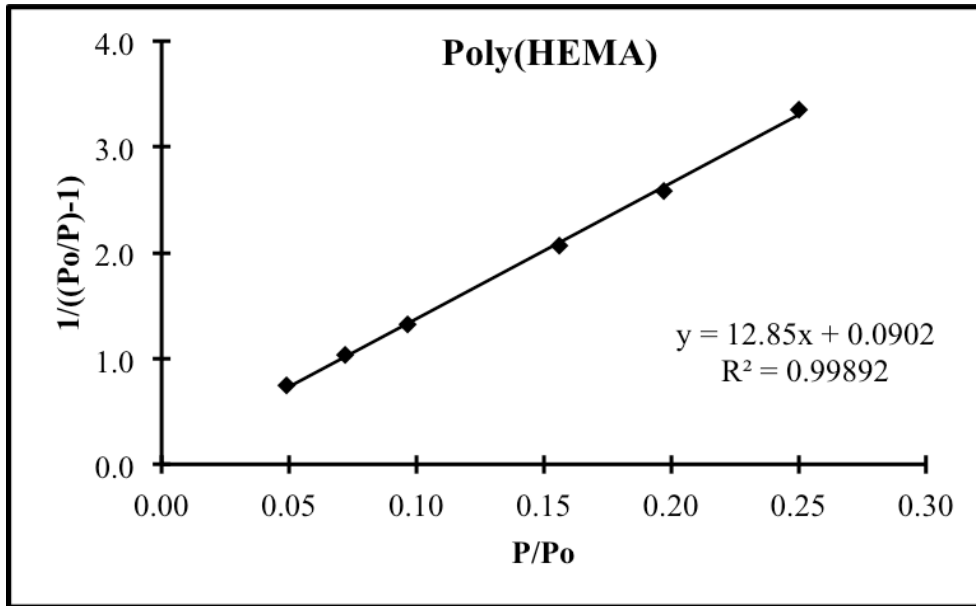

Figure SI-1. Multipoint surface area measurement of poly(HEMA) monolith.

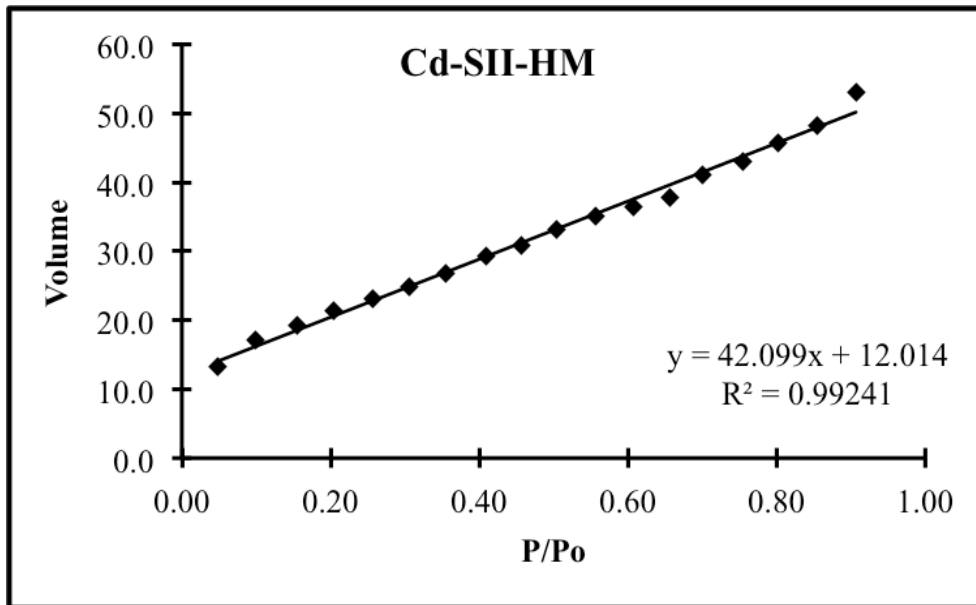

Figure SI-2. Multipoint surface area measurement of Cd-SII-HM before urea treatment.

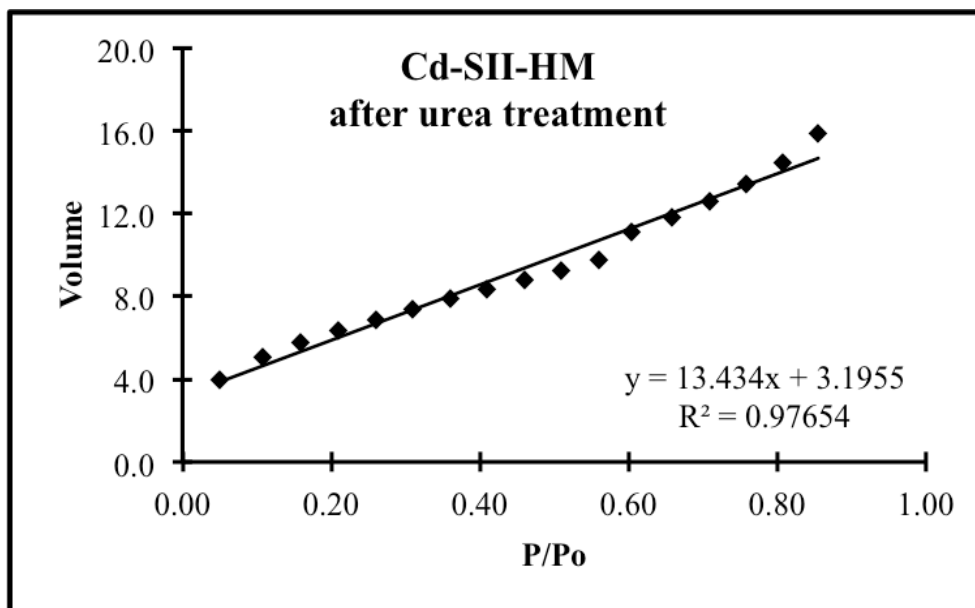

Figure SI-3. Multipoint surface area measurement of Cd-SII-HM after urea treatment.

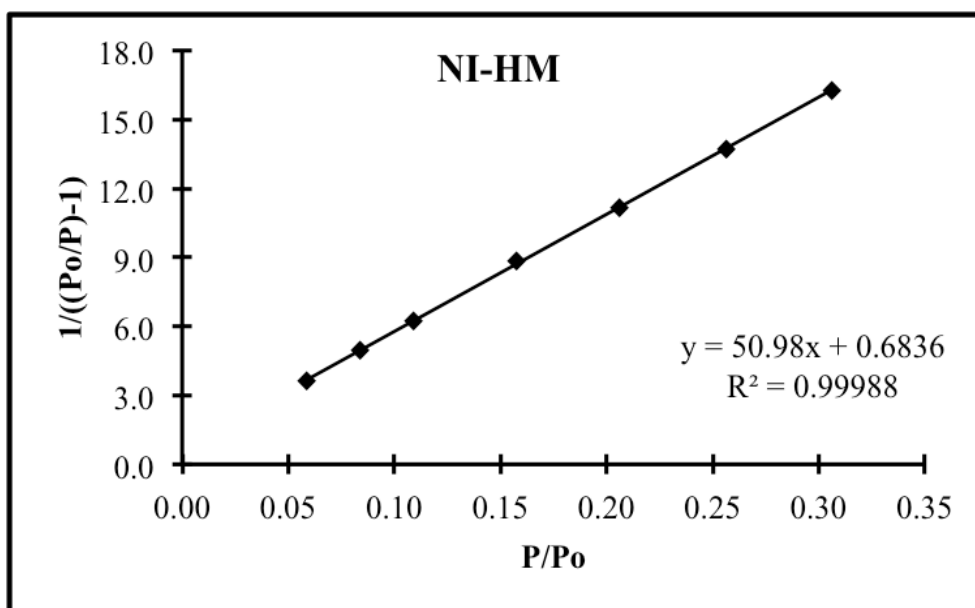

Figure SI-4. Multipoint surface area measurement of NI-HM before urea treatment.

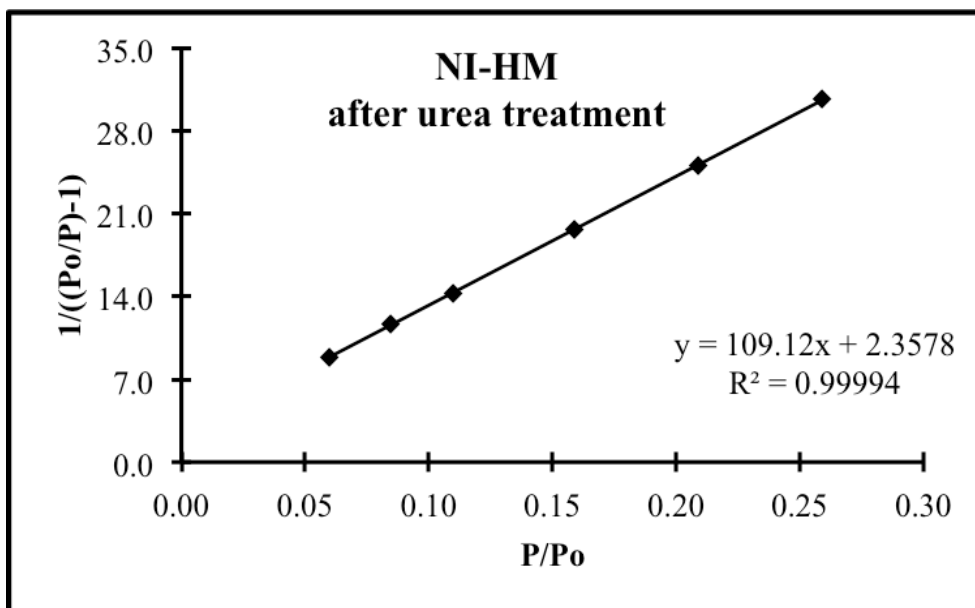

Figure SI-5. Multipoint surface area measurement of NI-HM after urea treatment.

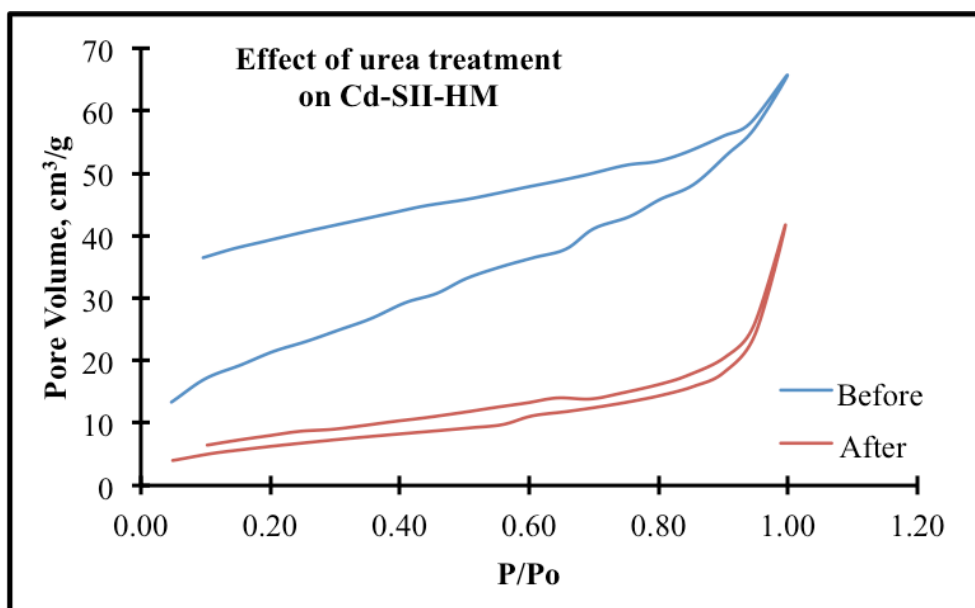

Figure SI-6. The effects of urea treatment on pore volume distribution through Cd-SII-HM.

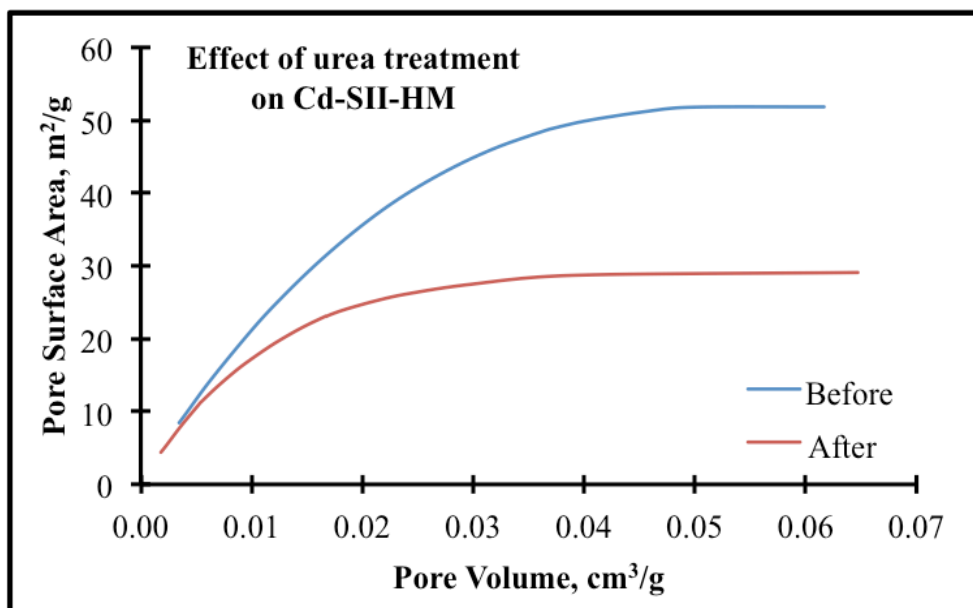

Figure SI-7. The effects of urea treatment on pore volume/pore surface area correlation through Cd-SII-HM.

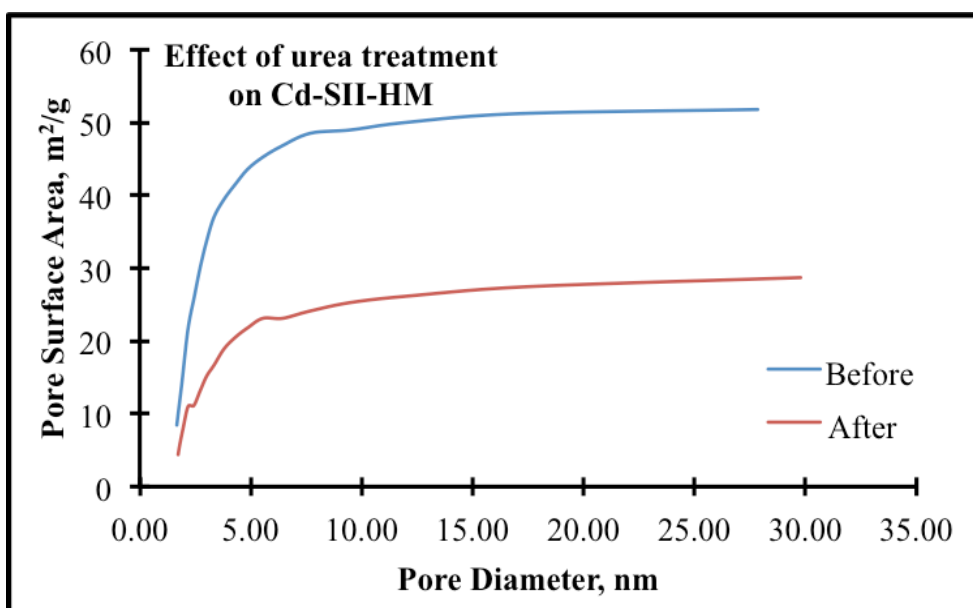

Figure SI-8. The effects of urea treatment on pore diameter/pore surface area correlation through Cd-SII-HM.

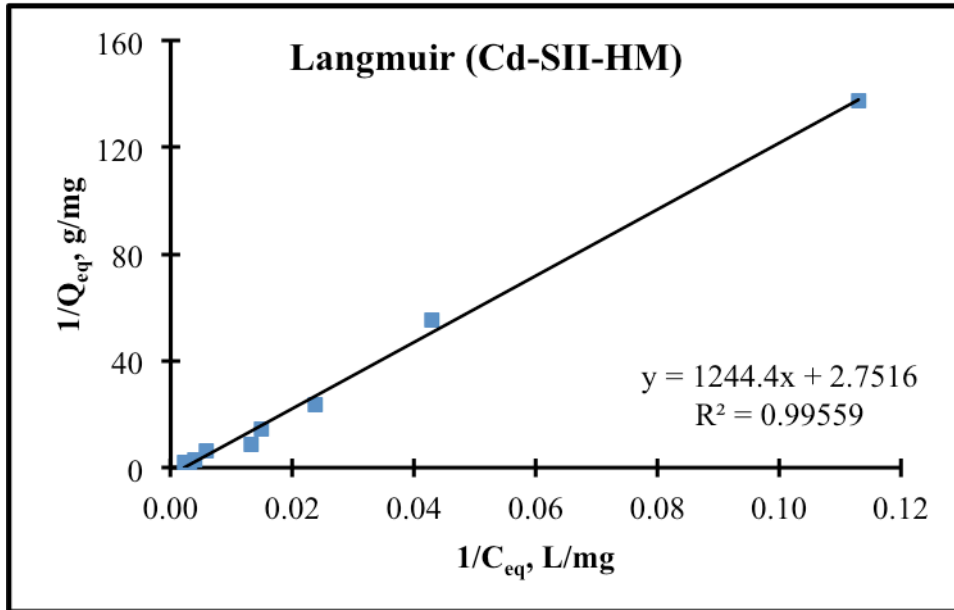

Figure SI-9. Langmuir isotherm for Cd-SII-HM.

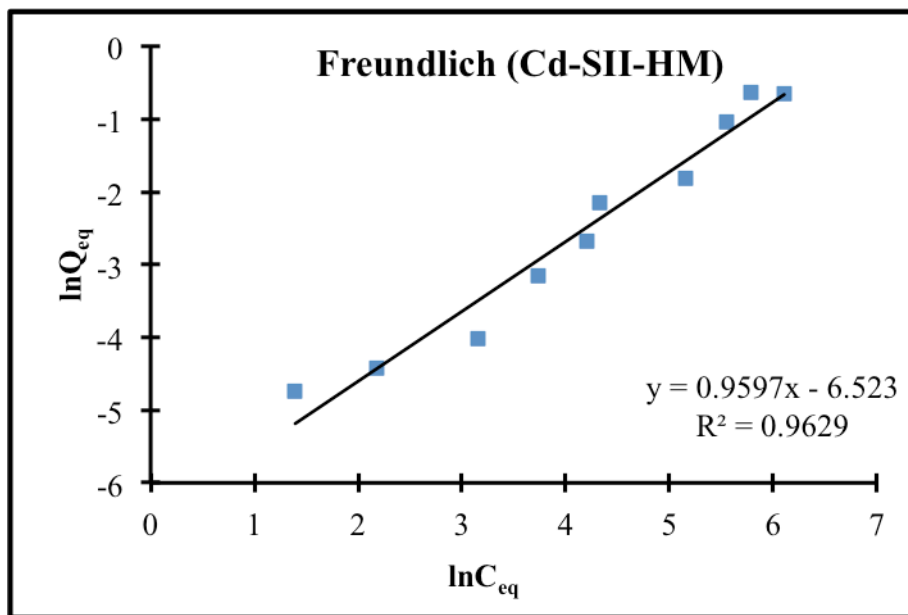

Figure SI-10. Freundlich isotherm for Cd-SII-HM.

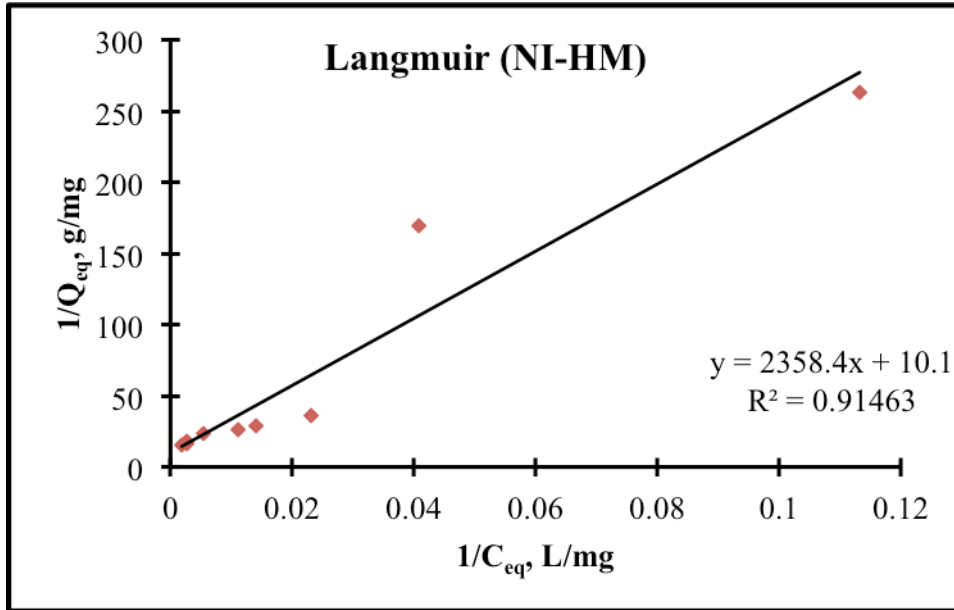

Figure SI-11. Langmuir isotherm for NI-HM.

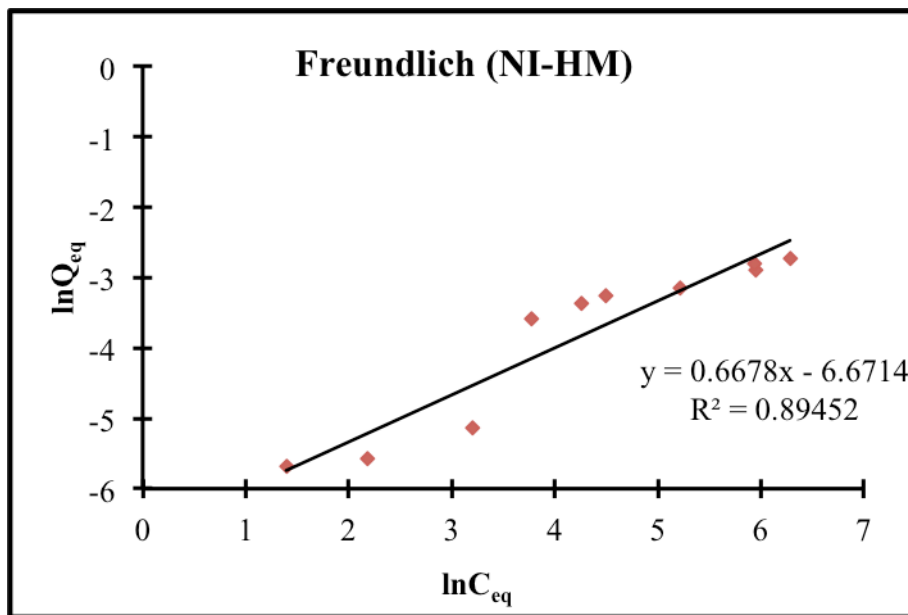

Figure SI-12. Freundlich isotherm for NI-HM.

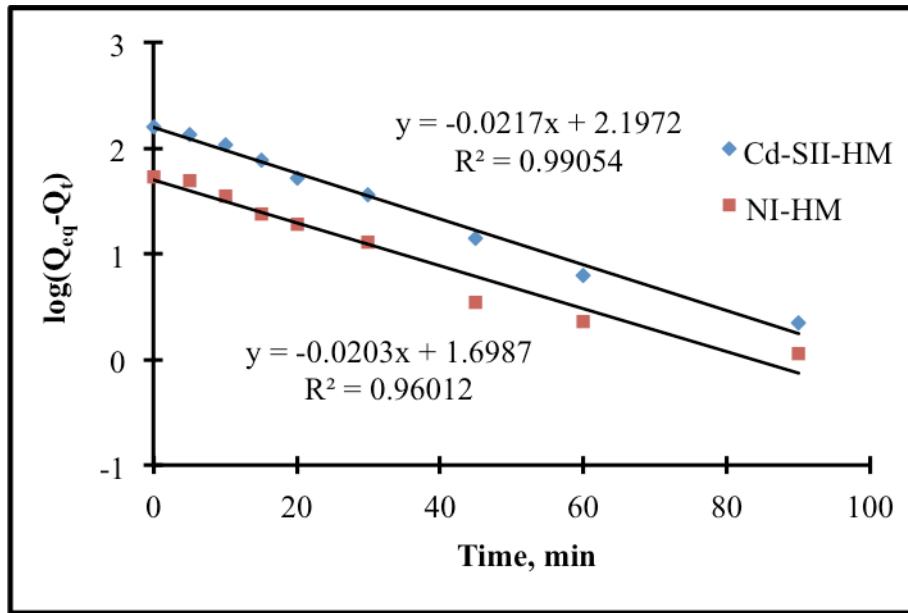

Figure SI-13. Pseudo-First order kinetic model for Cd-SII- and NI-HMs.

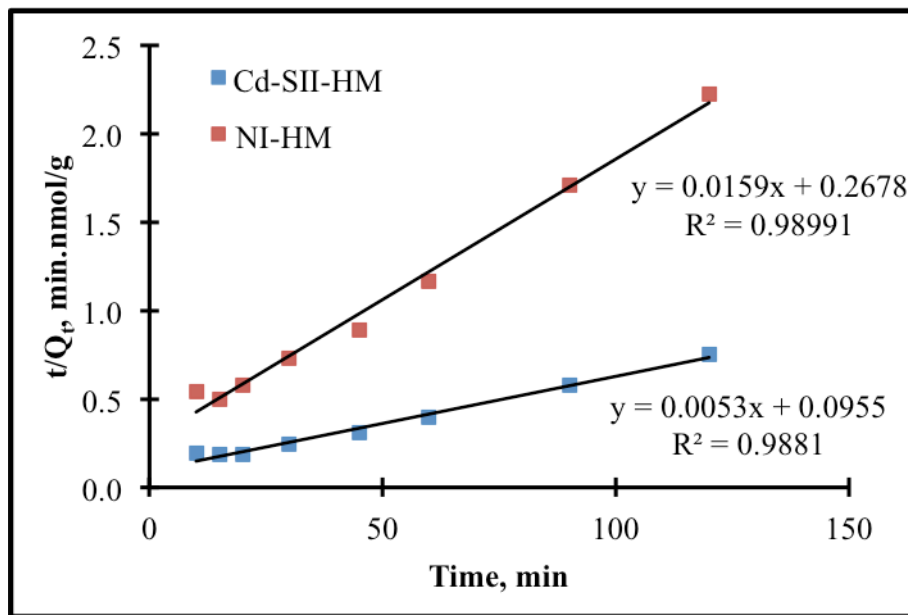

Figure SI-14. Pseudo-First order kinetic model for Cd-SII- and NI-HMs.



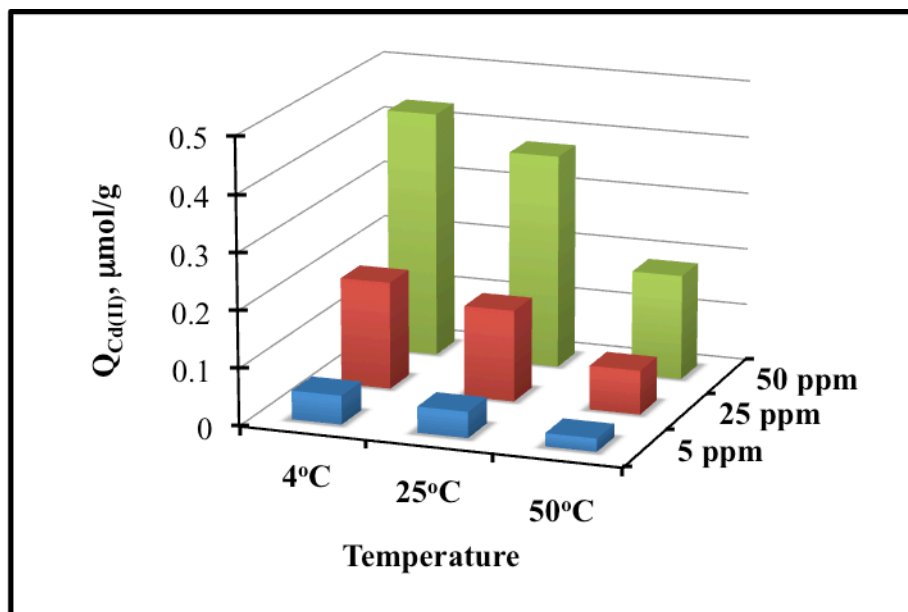

Figure SI-15. The comparison of the effect of temperature on Cd-SII-HMs adsorption capacity with correlation of initial Cd(II) ions concentration.

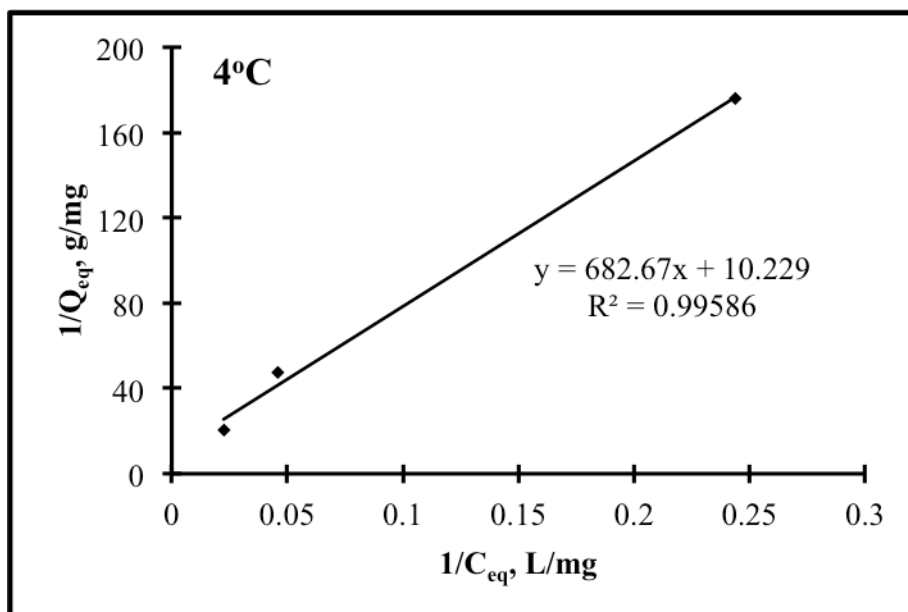

Figure SI-16. Langmuir isotherm for Cd-SII-HM at 4°C.

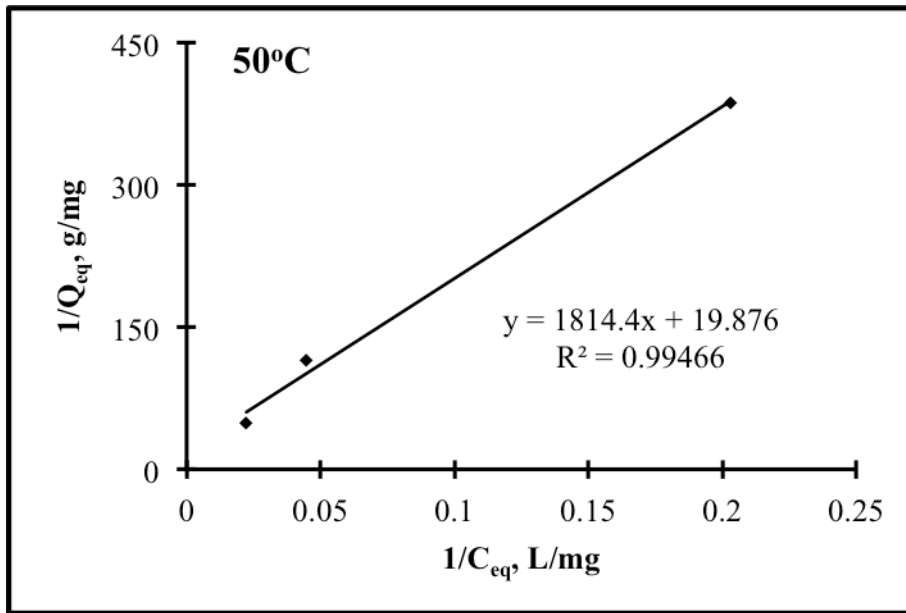

Figure SI-17. Langmuir isotherm for Cd-SII-HM at 50°C.

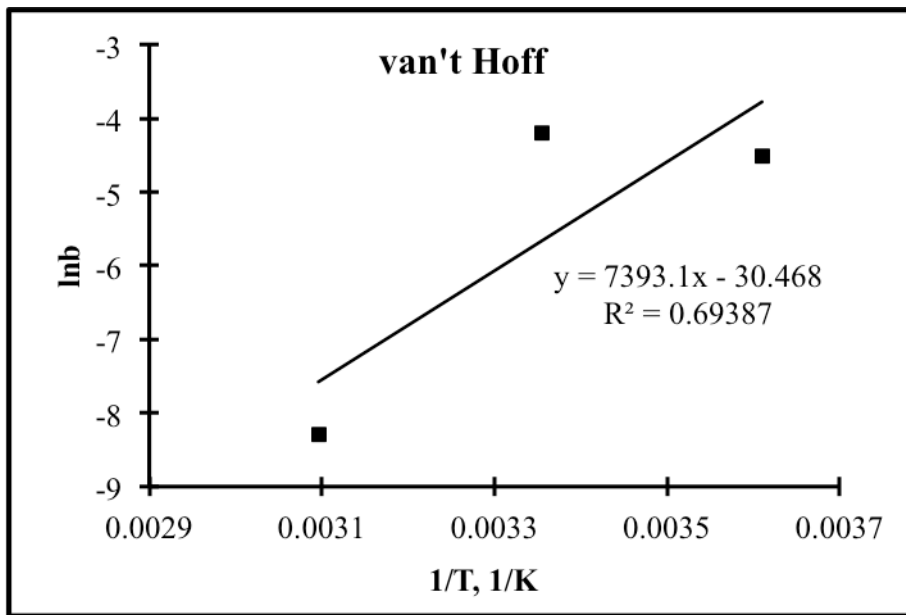

Figure SI-18. van't Hoff plot for Cd-SII-HM.

File name: C:\QCdata\PhysData\CA-3.RAW

Sample ID: 3 [poly(HEMA)]

Description: C. ARMUTCU

Comments:

Operator: KB Sample weight: 0.0969 g

Analysis gas: NITROGEN X sect. area: 16.2 Å<sup>2</sup>/molec Non-ideality: 6.58e-05

Adsorbate (DRP): Nitrogen Bath Temp.: 77.40

Outgas Temp: 100.0 °C Outgas Time: 1.0 hrs Analysis Time: 272.1 min

P/Po tolerance: 3 Equil. time: 2 End of run: 10/23/2015 14:29

Station #: 4 PC sw. version: 1.23

#### MULTIPOINT BET

| P/Po       | Volume<br>[cc/g] STP | 1/(W((Po/P)-1)) |
|------------|----------------------|-----------------|
| 4.9215e-02 | 55.5882              | 7.450E-01       |
| 7.2023e-02 | 60.3241              | 1.029E+00       |
| 9.6737e-02 | 64.8915              | 1.321E+00       |
| 1.5608e-01 | 71.6528              | 2.065E+00       |
| 1.9731e-01 | 76.0386              | 2.587E+00       |
| 2.5038e-01 | 79.6786              | 3.354E+00       |

Area = 2.691E+02 m<sup>2</sup>/g

Slope = 1.285E+01

Y - Intercept = 9.033E-02

Correlation Coefficient = 0.999455

C = 1.432E+02

File name: C:\QCdata\PhysData\CA-4.RAW

**Sample ID: 4 (NI-HM after urea)**

Description: C. ARMUTCU

Comments:

Operator: KB Sample weight: 0.1176 g

Analysis gas: NITROGEN X sect. area: 16.2 Å<sup>2</sup>/molec Non-ideality: 6.58e-05

Adsorbate (DRP): Nitrogen Bath Temp.: 77.40

Outgas Temp: 100.0 °C Outgas Time: 1.0 hrs Analysis Time: 115.6 min

P/Po tolerance: 3 Equil. time: 2 End of run: 10/23/2015 11:52

Station #: 5 PC sw. version: 1.23

#### MULTIPOINT BET

| P/Po       | Volume<br>[cc/g] STP | 1/(W((Po/P)-1)) |
|------------|----------------------|-----------------|
| 5.9846e-02 | 5.7142               | 8.913E+00       |
| 8.4539e-02 | 6.3551               | 1.163E+01       |
| 1.0976e-01 | 6.8992               | 1.430E+01       |
| 1.5900e-01 | 7.6894               | 1.967E+01       |
| 2.0901e-01 | 8.4302               | 2.508E+01       |
| 2.5914e-01 | 9.1115               | 3.072E+01       |

Area = 3.124E+01 m<sup>2</sup>/g

Slope = 1.091E+02

Y - Intercept = 2.358E+00

Correlation Coefficient = 0.999973

C = 4.728E+01

File name: C:\QCdata\PhysData\CA-5.RAW

Sample ID: 5 (NI-HM)

Description: C. ARMUTCU

Comments:

Operator: KB Sample weight: 0.1082 g

Analysis gas: NITROGEN X sect. area: 16.2 Å<sup>2</sup>/molec Non-ideality: 6.58e-05

Adsorbate (DRP): Nitrogen Bath Temp.: 77.40

Outgas Temp: 100.0 °C Outgas Time: 1.0 hrs Analysis Time: 153.2 min

P/Po tolerance: 3 Equil. time: 2 End of run: 10/23/2015 12:30

Station #: 6 PC sw. version: 1.23

#### MULTIPOINT BET

| P/Po       | Volume<br>[cc/g] STP | 1/(W((Po/P)-1)) |
|------------|----------------------|-----------------|
| 5.8770e-02 | 13.8157              | 3.616E+00       |
| 8.4045e-02 | 14.7634              | 4.973E+00       |
| 1.0910e-01 | 15.6447              | 6.263E+00       |
| 1.5767e-01 | 16.9822              | 8.819E+00       |
| 2.0627e-01 | 18.5841              | 1.119E+01       |
| 2.5641e-01 | 20.1201              | 1.371E+01       |
| 3.0615e-01 | 21.6741              | 1.629E+01       |

Area = 6.741E+01 m<sup>2</sup>/g

Slope = 5.098E+01

Y - Intercept = 6.837E-01

Correlation Coefficient = 0.999940

C = 7.557E+01

File name: C:\QCdata\PhysData\CA-6.RAW

Sample ID: 6 (Cd-SII-HM after urea)

Description: C. ARMUTCU

Comments:

Operator: KB Sample weight: 0.1223 g  
Analysis gas: NITROGEN X sect. area: 16.2 Å<sup>2</sup>/molec Non-ideality: 6.58e-05  
Adsorbate (DRP): Nitrogen Bath Temp.: 77.40  
Outgas Temp: 100.0 °C Outgas Time: 1.0 hrs Analysis Time: 276.9 min  
P/Po tolerance: 3 Equil. time: 2 End of run: 10/23/2015 20:45  
Station #: 3 PC sw. version: 1.23

### Isotherm

| P/Po       | Volume     | P/Po       | Volume     | P/Po       | Volume     |
|------------|------------|------------|------------|------------|------------|
|            | [cc/g] STP |            | [cc/g] STP |            | [cc/g] STP |
| 4.9461e-02 | 3.9630     | 7.0825e-01 | 12.5898    | 6.4341e-01 | 14.0148    |
| 1.0770e-01 | 5.0874     | 7.5762e-01 | 13.4544    | 5.9652e-01 | 13.2208    |
| 1.5936e-01 | 5.7661     | 8.0679e-01 | 14.4986    | 5.4921e-01 | 12.5179    |
| 2.0956e-01 | 6.3596     | 8.5511e-01 | 15.8989    | 5.0220e-01 | 11.7671    |
| 2.5965e-01 | 6.8975     | 9.0103e-01 | 18.1062    | 4.3977e-01 | 10.8512    |
| 3.0970e-01 | 7.4151     | 9.4917e-01 | 24.2008    | 3.9188e-01 | 10.2590    |
| 3.5981e-01 | 7.8888     | 9.9608e-01 | 41.7265    | 3.4427e-01 | 9.5969     |
| 4.0987e-01 | 8.3391     | 9.4680e-01 | 25.5227    | 2.9625e-01 | 8.9913     |
| 4.5987e-01 | 8.7783     | 9.0312e-01 | 20.5619    | 2.4650e-01 | 8.6774     |
| 5.0973e-01 | 9.2344     | 8.4607e-01 | 17.6729    | 1.9853e-01 | 7.9805     |
| 5.5943e-01 | 9.7556     | 8.0227e-01 | 16.2215    | 1.5052e-01 | 7.2670     |
| 6.0466e-01 | 11.1400    | 7.4134e-01 | 14.7612    | 1.0274e-01 | 6.4647     |
| 6.5851e-01 | 11.8435    | 6.9511e-01 | 13.8553    |            |            |

### BJH DESORPTION PORE SIZE DISTRIBUTION

| Diameter | Pore Vol  | Pore Surf Area      | Dv(d)                 | Ds(d)     | Dv(log d)           | Ds(log d) |
|----------|-----------|---------------------|-----------------------|-----------|---------------------|-----------|
| Å        | [cc/g]    | [m <sup>2</sup> /g] | [m <sup>2</sup> /Å/g] | [cc/g]    | [m <sup>2</sup> /g] |           |
| 17.00    | 1.831E-03 | 4.309E+00           | 7.692E-04             | 1.810E+00 | 3.005E-02           | 7.073E+01 |
| 19.37    | 3.515E-03 | 7.786E+00           | 7.119E-04             | 1.470E+00 | 3.171E-02           | 6.549E+01 |
| 21.77    | 5.266E-03 | 1.100E+01           | 7.164E-04             | 1.316E+00 | 3.588E-02           | 6.591E+01 |
| 24.35    | 5.341E-03 | 1.113E+01           | 2.754E-05             | 4.525E-02 | 1.543E-03           | 2.534E+00 |
| 27.13    | 6.669E-03 | 1.309E+01           | 4.661E-04             | 6.873E-01 | 2.908E-02           | 4.289E+01 |
| 30.12    | 8.228E-03 | 1.516E+01           | 4.970E-04             | 6.600E-01 | 3.443E-02           | 4.573E+01 |
| 33.47    | 9.504E-03 | 1.668E+01           | 3.578E-04             | 4.276E-01 | 2.755E-02           | 3.292E+01 |
| 38.00    | 1.163E-02 | 1.892E+01           | 3.873E-04             | 4.077E-01 | 3.383E-02           | 3.561E+01 |
| 43.23    | 1.339E-02 | 2.054E+01           | 3.533E-04             | 3.270E-01 | 3.513E-02           | 3.251E+01 |
| 48.73    | 1.494E-02 | 2.182E+01           | 2.573E-04             | 2.112E-01 | 2.884E-02           | 2.367E+01 |
| 55.44    | 1.671E-02 | 2.310E+01           | 2.399E-04             | 1.731E-01 | 3.058E-02           | 2.206E+01 |
| 64.41    | 1.671E-02 | 2.310E+01           | 0.000E+00             | 0.000E+00 | 0.000E+00           | 0.000E+00 |
| 76.04    | 1.853E-02 | 2.405E+01           | 1.429E-04             | 7.518E-02 | 2.496E-02           | 1.313E+01 |
| 95.00    | 2.141E-02 | 2.527E+01           | 1.142E-04             | 4.809E-02 | 2.484E-02           | 1.046E+01 |
| 122.49   | 2.426E-02 | 2.620E+01           | 9.595E-05             | 3.133E-02 | 2.693E-02           | 8.793E+00 |
| 175.93   | 2.980E-02 | 2.746E+01           | 7.181E-05             | 1.633E-02 | 2.862E-02           | 6.507E+00 |

297.78 3.899E-02 2.869E+01 5.513E-05 7.406E-03 3.680E-02 4.943E+00  
2647.63 6.471E-02 2.908E+01 5.676E-06 8.575E-05 2.317E-02 3.500E-01

#### AREA-VOLUME-PORE SIZE SUMMARY

##### SURFACE AREA DATA

Multipoint BET..... 2.352E+01 m<sup>2</sup>/g  
BJH Method Cumulative Adsorption Surface Area..... 3.117E+01 m<sup>2</sup>/g  
BJH Method Cumulative Desorption Surface Area..... 2.908E+01 m<sup>2</sup>/g  
DH Method Cumulative Adsorption Surface Area..... 3.253E+01 m<sup>2</sup>/g  
DH Method Cumulative Desorption Surface Area..... 3.040E+01 m<sup>2</sup>/g  
DR Method Micro Pore Area..... 3.311E+01 m<sup>2</sup>/g

##### PORE VOLUME DATA

BJH Method Cumulative Adsorption Pore Volume..... 6.735E-02 cc/g  
BJH Method Cumulative Desorption Pore Volume..... 6.471E-02 cc/g  
DH Method Cumulative Adsorption Pore Volume..... 6.560E-02 cc/g  
DH Method Cumulative Desorption Pore Volume..... 6.330E-02 cc/g  
DR Method Micro Pore Volume..... 1.180E-02 cc/g  
HK Method Cumulative Pore Volume..... 8.813E-03 cc/g  
SF Method Cumulative Pore Volume..... 9.083E-03 cc/g

##### PORE SIZE DATA

BJH Method Adsorption Pore Diameter (Mode)..... 1.444E+01 Å  
BJH Method Desorption Pore Diameter (Mode)..... 1.700E+01 Å  
DH Method Adsorption Pore Diameter (Mode)..... 1.444E+01 Å  
DH Method Desorption Pore Diameter (Mode)..... 1.700E+01 Å  
DR Method Micro Pore Width ..... 4.306E+01 Å  
DA Method Pore Diameter (Mode)..... 2.100E+01 Å  
HK Method Pore Width (Mode)..... 3.575E+00 Å  
SF Method Pore Diameter (Mode)..... 4.477E+00 Å

##### DATA REDUCTION PARAMETERS

Thermal Transpiration : OFF  
Last Po Acquired 784.41 mm Hg  
Additional Initialization Information Not Recorded.

BJH/DH Moving Average Size : 1  
Thickness method : DeBoer

Interaction Constant (K) 2.9600 nm<sup>3</sup> x kJ/mol

File name: C:\QCdata\PhysData\CA-7.RAW

Sample ID: 7 (Cd-SII-HM)

Description: C. ARMUTCU

Comments:

Operator: KB Sample weight: 0.0979 g  
Analysis gas: NITROGEN X sect. area: 16.2 Å<sup>2</sup>/molec Non-ideality: 6.58e-05  
Adsorbate (DRP): Nitrogen Bath Temp.: 77.40  
Outgas Temp: 100.0 °C Outgas Time: 1.0 hrs Analysis Time: 377.9 min  
P/Po tolerance: 3 Equil. time: 2 End of run: 10/23/2015 22:26  
Station #: 4 PC sw. version: 1.23

### Isotherm

| P/Po       | Volume     | P/Po       | Volume     | P/Po       | Volume     |
|------------|------------|------------|------------|------------|------------|
|            | [cc/g] STP |            | [cc/g] STP |            | [cc/g] STP |
| 4.7414e-02 | 13.3090    | 7.0013e-01 | 41.1376    | 6.4299e-01 | 48.7319    |
| 9.9470e-02 | 17.0815    | 7.5535e-01 | 43.0718    | 5.9633e-01 | 47.7786    |
| 1.5477e-01 | 19.3067    | 8.0200e-01 | 45.7882    | 5.4982e-01 | 46.7666    |
| 2.0484e-01 | 21.4594    | 8.5373e-01 | 48.1653    | 5.0306e-01 | 45.8066    |
| 2.5649e-01 | 23.0964    | 9.0659e-01 | 53.0489    | 4.3915e-01 | 44.7776    |
| 3.0566e-01 | 24.8840    | 9.4756e-01 | 57.0731    | 3.9252e-01 | 43.7486    |
| 3.5555e-01 | 26.7231    | 9.9908e-01 | 65.7272    | 3.4584e-01 | 42.7062    |
| 4.0875e-01 | 29.2701    | 9.4183e-01 | 58.0394    | 2.9907e-01 | 41.6586    |
| 4.5700e-01 | 30.7478    | 8.9951e-01 | 55.9204    | 2.5229e-01 | 40.5943    |
| 5.0316e-01 | 33.1512    | 8.4214e-01 | 53.3295    | 1.8948e-01 | 39.0504    |
| 5.5583e-01 | 34.9999    | 7.9725e-01 | 51.8911    | 1.4254e-01 | 37.8965    |
| 6.0701e-01 | 36.4809    | 7.4958e-01 | 51.2837    | 9.6341e-02 | 36.4800    |
| 6.5709e-01 | 37.8704    | 6.8941e-01 | 49.7657    |            |            |

### BJH DESORPTION PORE SIZE DISTRIBUTION

| Diameter | Pore Vol  | Pore Surf Area      | Dv(d)                 | Ds(d)     | Dv(log d)           | Ds(log d) |
|----------|-----------|---------------------|-----------------------|-----------|---------------------|-----------|
| Å        | [cc/g]    | [m <sup>2</sup> /g] | [m <sup>2</sup> /Å/g] | [cc/g]    | [m <sup>2</sup> /g] |           |
| 16.64    | 3.515E-03 | 8.452E+00           | 1.516E-03             | 3.646E+00 | 5.798E-02           | 1.394E+02 |
| 18.95    | 6.216E-03 | 1.415E+01           | 1.170E-03             | 2.471E+00 | 5.100E-02           | 1.077E+02 |
| 21.70    | 1.023E-02 | 2.156E+01           | 1.256E-03             | 2.316E+00 | 6.266E-02           | 1.155E+02 |
| 24.58    | 1.301E-02 | 2.607E+01           | 1.082E-03             | 1.761E+00 | 6.119E-02           | 9.957E+01 |
| 27.26    | 1.576E-02 | 3.012E+01           | 9.893E-04             | 1.452E+00 | 6.204E-02           | 9.104E+01 |
| 30.19    | 1.852E-02 | 3.378E+01           | 8.954E-04             | 1.186E+00 | 6.219E-02           | 8.240E+01 |
| 33.47    | 2.123E-02 | 3.701E+01           | 7.804E-04             | 9.327E-01 | 6.009E-02           | 7.182E+01 |
| 38.01    | 2.355E-02 | 3.945E+01           | 4.119E-04             | 4.334E-01 | 3.599E-02           | 3.787E+01 |
| 43.30    | 2.588E-02 | 4.160E+01           | 4.700E-04             | 4.341E-01 | 4.681E-02           | 4.324E+01 |
| 48.75    | 2.833E-02 | 4.361E+01           | 4.129E-04             | 3.388E-01 | 4.630E-02           | 3.799E+01 |
| 55.39    | 3.054E-02 | 4.521E+01           | 3.012E-04             | 2.175E-01 | 3.837E-02           | 2.771E+01 |
| 63.71    | 3.292E-02 | 4.670E+01           | 2.558E-04             | 1.606E-01 | 3.745E-02           | 2.352E+01 |
| 76.74    | 3.636E-02 | 4.849E+01           | 2.049E-04             | 1.068E-01 | 3.606E-02           | 1.880E+01 |
| 95.06    | 3.747E-02 | 4.896E+01           | 5.593E-05             | 2.353E-02 | 1.220E-02           | 5.132E+00 |
| 119.52   | 4.046E-02 | 4.997E+01           | 1.032E-04             | 3.453E-02 | 2.825E-02           | 9.455E+00 |



170.57 4.567E-02 5.119E+01 7.124E-05 1.671E-02 2.754E-02 6.460E+00  
278.44 4.967E-02 5.176E+01 2.804E-05 4.028E-03 1.757E-02 2.525E+00  
10554.12 6.166E-02 5.181E+01 5.875E-07 2.227E-06 6.761E-03 2.562E-02

AREA-VOLUME-PORE SIZE SUMMARY

SURFACE AREA DATA

Multipoint BET..... 7.912E+01 m<sup>2</sup>/g  
BJH Method Cumulative Adsorption Surface Area..... 1.088E+02 m<sup>2</sup>/g  
BJH Method Cumulative Desorption Surface Area..... 5.181E+01 m<sup>2</sup>/g  
DH Method Cumulative Adsorption Surface Area..... 1.139E+02 m<sup>2</sup>/g  
DH Method Cumulative Desorption Surface Area..... 5.346E+01 m<sup>2</sup>/g  
DR Method Micro Pore Area..... 1.114E+02 m<sup>2</sup>/g

PORE VOLUME DATA

BJH Method Cumulative Adsorption Pore Volume..... 1.113E-01 cc/g  
BJH Method Cumulative Desorption Pore Volume..... 6.166E-02 cc/g  
DH Method Cumulative Adsorption Pore Volume..... 1.097E-01 cc/g  
DH Method Cumulative Desorption Pore Volume..... 6.036E-02 cc/g  
DR Method Micro Pore Volume..... 3.969E-02 cc/g  
HK Method Cumulative Pore Volume..... 2.981E-02 cc/g  
SF Method Cumulative Pore Volume..... 3.074E-02 cc/g

PORE SIZE DATA

BJH Method Adsorption Pore Diameter (Mode)..... 1.417E+01 Å  
BJH Method Desorption Pore Diameter (Mode)..... 1.664E+01 Å  
DH Method Adsorption Pore Diameter (Mode)..... 1.417E+01 Å  
DH Method Desorption Pore Diameter (Mode)..... 1.664E+01 Å  
DR Method Micro Pore Width ..... 4.240E+01 Å  
DA Method Pore Diameter (Mode)..... 2.080E+01 Å  
HK Method Pore Width (Mode)..... 3.625E+00 Å  
SF Method Pore Diameter (Mode)..... 4.477E+00 Å

DATA REDUCTION PARAMETERS

Thermal Transpiration : OFF  
Last Po Acquired 764.69 mm Hg  
Additional Initialization Information Not Recorded.

BJH/DH Moving Average Size : 1  
Thickness method : DeBoer

Interaction Constant (K) 2.9600 nm<sup>3</sup> x kJ/mol
